# Supplementary material for: Analytical Methods of Phytochemicals from the Genus Gentiana
Source: PubMed Central journal article supplement (PMC6149888; doi:10.3390/molecules22122080), 2017-11-28
Supplement: molecules-22-02080-s001.pdf [file molecules-22-02080-s001.pdf]

Table S1. The information of plants which checked in Plant List databases

| Name                                                                    |
|-------------------------------------------------------------------------|
| <i>Gentiana acaulis</i> L.                                              |
| <i>Gentiana affinis</i> Griseb.                                         |
| <i>Gentiana affinis</i> subsp. <i>rusbyi</i> (Greene ex Kusn.) Halda    |
| <i>Gentiana alata</i> T.N.Ho                                            |
| <i>Gentiana alba</i> Muhl.                                              |
| <i>Gentiana albicalyx</i> Burkill                                       |
| <i>Gentiana albicalyx</i> subsp. <i>globosa</i> (T.N.Ho) Halda          |
| <i>Gentiana albomarginata</i> C.Marquand                                |
| <i>Gentiana albomarginata</i> subsp. <i>scytophylla</i> (T.N.Ho) Halda  |
| <i>Gentiana algida</i> Pall.                                            |
| <i>Gentiana algida</i> var. <i>purdomii</i> (C.Marquand) T.N.Ho         |
| <i>Gentiana alii</i> (Omer & Qaiser) T.N.Ho                             |
| <i>Gentiana alpina</i> Vill.                                            |
| <i>Gentiana alpina</i> var. <i>transiens</i> Nègre                      |
| <i>Gentiana alsinoides</i> Franch.                                      |
| <i>Gentiana alsinoides</i> subsp. <i>scabrifilamenta</i> (T.N.Ho) Halda |
| <i>Gentiana altigena</i> Harry Sm.                                      |
| <i>Gentiana alorum</i> Harry Sm. ex C.Marquand                          |
| <i>Gentiana</i> × <i>ambigua</i> Hayek                                  |
| <i>Gentiana amplicrater</i> Burkill                                     |
| <i>Gentiana andrewsii</i> Griseb.                                       |
| <i>Gentiana andrewsii</i> var. <i>dakotica</i> A.Nelson                 |
| <i>Gentiana angustifolia</i> Vill.                                      |
| <i>Gentiana anisostemon</i> C.Marquand                                  |
| <i>Gentiana annaverae</i> Pinzaru                                       |
| <i>Gentiana aperta</i> Maxim.                                           |
| <i>Gentiana apiata</i> N.E.Br.                                          |
| <i>Gentiana aquatica</i> L.                                             |
| <i>Gentiana aquatica</i> var. <i>baltistanica</i> (Omer) Halda          |
| <i>Gentiana aquatica</i> var. <i>bomiensis</i> (T.N.Ho) Halda           |
| <i>Gentiana aquatica</i> subsp. <i>laeviuscula</i> (Ohwi) Ohwi          |
| <i>Gentiana aquatica</i> var. <i>pseudoaquatica</i> (Kusn.) S.Agrawal   |
| <i>Gentiana arenicola</i> Kerr                                          |
| <i>Gentiana arethusae</i> Burkill                                       |
| <i>Gentiana arethusae</i> subsp. <i>delicatula</i> (C.Marquand) Halda   |
| <i>Gentiana argentea</i> (Royle ex D.Don) Royle ex D.Don                |
| <i>Gentiana arisanensis</i> Hayata                                      |
| <i>Gentiana aristata</i> Maxim.                                         |
| <i>Gentiana aristata</i> subsp. <i>asparagoides</i> (T.N.Ho) Halda      |
| <i>Gentiana asclepiadea</i> L.                                          |
| <i>Gentiana asterocalyx</i> Diels                                       |
| <i>Gentiana atlantica</i> Litard. & Maire                               |
| <i>Gentiana atuntsiensis</i> W.W.Sm.                                    |

---

*Gentiana austromontana* J.S.Pringle & Sharp  
*Gentiana autumnalis* L.  
*Gentiana autumnalis* subsp. *pennelliana* (Fernald) Halda  
*Gentiana axilliflora* Levl. & Vaniot  
*Gentiana baeuerlenii* L.G.Adams  
*Gentiana baeuerlenii* subsp. *bredboensis* (L.G.Adams) Halda  
*Gentiana bambuseti* T.Y.Hsieh, T.C.Hsu, S.M.Ku & C.I Peng  
*Gentiana bavarica* L.  
*Gentiana bavarica* var. *subacaulis* (Wahlenb.) Schleich.  
*Gentiana beamanii* J.S.Pringle  
*Gentiana bella* Franch. ex Hemsl.  
*Gentiana bicuspidata* (G.Don) Briq.  
*Gentiana* × *billingtonii* Farw.  
*Gentiana boissieri* Schott & Kotschy ex Boiss.  
*Gentiana bokorensis* Hul  
*Gentiana borneensis* Hook.f.  
*Gentiana borneensis* subsp. *apoensis* (Merr.) Halda  
*Gentiana borneensis* subsp. *malayana* (Ridl.) Halda  
*Gentiana boryi* Boiss.  
*Gentiana brachyphylla* Vill.  
*Gentiana brachyphylla* subsp. *favratii* (Rittener) Tutin  
*Gentiana brentae* Prosser & Bertolli  
*Gentiana bryoides* Burkill  
*Gentiana burseri* Lapeyr.  
*Gentiana burseri* subsp. *villarsii* (Griseb.) Rouy  
*Gentiana cachemirica* Decne.  
*Gentiana caelestis* (C.Marquand) Harry Sm.  
*Gentiana caeruleogrisea* T.N.Ho  
*Gentiana caliculata* Lex.  
*Gentiana calycosa* Griseb.  
*Gentiana capitata* Buch.-Ham. ex D.Don  
*Gentiana capitata* subsp. *harwanensis* (G.Singh) Halda  
*Gentiana carinata* (D.Don) Griseb.  
*Gentiana carinicastrata* Wernham  
*Gentiana carinicastrata* subsp. *sclerophylla* (P.Royen) Halda  
*Gentiana caryophyllea* Harry Sm.  
*Gentiana catesbaei* Walter  
*Gentiana cephalantha* Franch. ex Hemsl.  
*Gentiana cephalantha* subsp. *vaniotii* (H.Le\$Av.) Halda  
*Gentiana cephalodes* Edgew.  
*Gentiana* × *charpentieri* Thomas ex Hegetschw.  
*Gentiana chateri* T.N.Ho  
*Gentiana chinensis* Kusn.  
*Gentiana choanantha* C.Marquand  
*Gentiana choanantha* subsp. *curvianthera* (T.N.Ho) Halda  
*Gentiana chosenica* Okuyama

---

---

*Gentiana chungtienensis* C.Marquand  
*Gentiana chungtienensis* subsp. *subuniflora* (C.Marquand) Halda  
*Gentiana clarkei* Kusn.  
*Gentiana clarkei* subsp. *conduplicata* (T.N.Ho) Halda  
*Gentiana clausa* Raf.  
*Gentiana clusii* Perr. & Songeon  
*Gentiana clusii* subsp. *rochellii* (A.Kern.) Halda  
*Gentiana confertifolia* C.Marquand  
*Gentiana coronata* (D.Don ex Royle) Griseb.  
*Gentiana crassa* Kurz  
*Gentiana crassa* subsp. *rigescens* (Franch. ex Hemsl.) Halda  
*Gentiana crassicaulis* Duthie ex Burkill  
*Gentiana crassula* Harry Sm.  
*Gentiana crassuloides* Bureau & Franch.  
*Gentiana crassuloides* subsp. *curviphylla* (T.N.Ho) Halda  
*Gentiana crassuloides* subsp. *mailingensis* (T.N.Ho) Halda  
*Gentiana crassuloides* subsp. *nyingchiensis* (T.N.Ho) Halda  
*Gentiana cristata* Harry Sm.  
*Gentiana cruciata* L.  
*Gentiana cruttwellii* Harry Sm.  
*Gentiana cuneibarba* Harry Sm.  
*Gentiana* × *curtisii* J.S.Pringle  
*Gentiana dahurica* Fisch.  
*Gentiana damyonensis* C.Marquand  
*Gentiana damyonensis* subsp. *hicksii* (Harry Sm.) Halda  
*Gentiana davidii* Franch.  
*Gentiana davidii* var. *formosana* (Hayata) T.N.Ho  
*Gentiana davidii* var. *fukienensis* (Y.Ling) T.N.Ho  
*Gentiana decemfida* Buch.-Ham. ex D.Don  
*Gentiana decora* Pollard  
*Gentiana decorata* Diels  
*Gentiana decorata* subsp. *leucantha* (Harry Sm.) Halda  
*Gentiana decumbens* L.f.  
*Gentiana delavayi* Franch.  
*Gentiana deltoidea* Harry Sm.  
*Gentiana dendrologi* C.Marquand  
*Gentiana densiflora* T.N.Ho  
*Gentiana depressa* D.Don  
*Gentiana* × *digenea* Jakow.  
*Gentiana dinarica* Beck  
*Gentiana divaricata* T.N.Ho  
*Gentiana diversifolia* Merr.  
*Gentiana douglasiana* Bong.  
*Gentiana doxiongshangensis* T.N.Ho  
*Gentiana dschungarica* Regel  
*Gentiana duclouxii* Franch.

---

---

*Gentiana durangensis* Villarreal  
*Gentiana ecaudata* C.Marquand  
*Gentiana elmeriana* Halda  
*Gentiana ehwesii* C.B.Clarke  
*Gentiana emodi* C.Marquand ex Sealy  
*Gentiana ettingshausenii* F.Muell.  
*Gentiana exigua* Harry Sm.  
*Gentiana expansa* Harry Sm.  
*Gentiana faucipilosa* Harry Sm.  
*Gentiana fieldiana* J.S.Pringle  
*Gentiana filistyla* Balf.f. & Forrest  
*Gentiana flavomaculata* Hayata  
*Gentiana flavomaculata subsp. tatakensis* (Masam.) Halda  
*Gentiana flexicaulis* Harry Sm.  
*Gentiana flexicaulis var. complexa* (T.N.Ho) Halda  
*Gentiana formosa* Harry Sm.  
*Gentiana forrestii* C.Marquand  
*Gentiana forrestii subsp. yakumontana* (Masam.) Halda  
*Gentiana franchetiana* Kusn.  
*Gentiana fremontii* Torr.  
*Gentiana frigida* Haenke  
*Gentiana froelichii* Jan ex Rchb.  
*Gentiana futtereri* Diels & Gilg  
*Gentiana* × *gaudiniana* Thomas ex W.D.J.Koch  
*Gentiana gelida* M.Bieb.  
*Gentiana gentilis* Franch.  
*Gentiana gentilis subsp. eurycolpa* (C.Marquand) Halda  
*Gentiana georgei* Diels  
*Gentiana gilvostriata* C.Marquand  
*Gentiana glauca* Pall.  
*Gentiana grandiflora* Laxm.  
*Gentiana* × *grandilacustris* J.S.Pringle  
*Gentiana grata* Harry Sm.  
*Gentiana grata var. bryophylla* (Harry Sm.) Halda  
*Gentiana grata subsp. burmensis* (C.Marquand) Halda  
*Gentiana* × *grisebachiana* Rouy  
*Gentiana grumii* Kusn.  
*Gentiana gyirongensis* T.N.Ho  
*Gentiana* × *haengstii* Hausm.  
*Gentiana handeliana* Harry Sm.  
*Gentiana handeliana subsp. erectosepala* (T.N.Ho) Halda  
*Gentiana haraldi-smithii* Halda  
*Gentiana harrowiana* Diels  
*Gentiana haynaldii* Kanitz  
*Gentiana heleonastes* Harry Sm.  
*Gentiana helophila* Balf.f. & Forrest

---

---

*Gentiana helophila* subsp. *dolichocalyx* (T.N.Ho) Halda  
*Gentiana hesseliana* Hosseus  
*Gentiana hexaphylla* Maxim. ex Kusn.  
*Gentiana himalayensis* T.N.Ho  
*Gentiana hirsuta* Ma & E.W.Ma ex T.N.Ho  
*Gentiana hohoxiliensis* S.K.Wu & R.F.Huang  
*Gentiana hooperi* J.S.Pringle  
*Gentiana hugelii* Griseb.  
*Gentiana huxleyi* Kusn.  
*Gentiana* × *hybrida* Schleich. ex DC.  
*Gentiana infelix* C.B.Clarke  
*Gentiana intricata* C.Marquand  
*Gentiana intricata* var. *subintricata* (T.N.Ho) Halda  
*Gentiana jamesii* Hemsl.  
*Gentiana jarmilae* Halda  
*Gentiana jingdongensis* T.N.Ho  
*Gentiana jouyana* Hul  
*Gentiana kaohsiungensis* Chih H.Chen & J.C.Wang  
*Gentiana kauffmanniana* Regel & Schmalh.  
*Gentiana khammouanensis* Hul  
*Gentiana kurroo* Royle  
*Gentiana kurroo* var. *lowndesii* (Blatt.) T.N.Ho  
*Gentiana kwangsiensis* T.N. Ho  
*Gentiana lacerulata* Harry Sm.  
*Gentiana laevigata* M.Martens & Galeotti  
*Gentiana laevigata* var. *hintoniorum* (B.L.Turner) T.N.Ho  
*Gentiana langbianensis* A.Chev. ex S.Hul  
*Gentiana lateriflora* Hemsl.  
*Gentiana lateriflora* var. *uncifolia* (H.J.Lam) T.N.Ho  
*Gentiana latidens* (House) J.S.Pringle & Weakley  
*Gentiana lawrencei* Burkill  
*Gentiana laxiflora* T.N.Ho  
*Gentiana leptoclada* Balf.f. & Forrest  
*Gentiana leptoclada* subsp. *australis* (Craib) Halda  
*Gentiana leroyana* Hul  
*Gentiana leucomelaena* Maxim.  
*Gentiana lhassica* Burkill  
*Gentiana liangshanensis* Z.Y.Zhu  
*Gentiana licentii* Harry Sm.  
*Gentiana ligustica* R.Vilm. & Chopinet  
*Gentiana linearis* Froel.  
*Gentiana lineolata* Franch.  
*Gentiana linoides* Franch. ex Hemsl.  
*Gentiana loerzingii* Ridl.  
*Gentiana longicollis* G.L.Nesom  
*Gentiana loureiroi* (G.Don) Griseb.

---

---

*Gentiana loureiroi* subsp. *napulifera* (Franch.) Halda  
*Gentiana lowryi* Hul  
*Gentiana lutea* L.  
*Gentiana lutea* var. *aurantiaca* (M.Láinz) M.Láinz  
*Gentiana lutea* subsp. *montserratii* (Vivant ex Greuter) Romo  
*Gentiana lutea* subsp. *symphyandra* (Murb.) Hayek  
*Gentiana lycopodioides* Stapf  
*Gentiana macgregoryi* Hemsl.  
*Gentiana macgregoryi* subsp. *piundensis* (P.Royen) Halda  
*Gentiana macrophylla* Pall.  
*Gentiana macrophylla* subsp. *fetisowii* (Regel & C.Winkl.) Halda  
*Gentiana macrophylla* var. *fetissowii* (Regel & Winkl.) Ma & K.C. Hsia  
*Gentiana maeulchanensis* Franch.  
*Gentiana maeulchanensis* subsp. *kunmingensis* (S.W.Liu ex T.N.Ho) Halda  
*Gentiana mairei* H.Lév.  
*Gentiana makinoi* Kusn.  
*Gentiana manshurica* Kitag.  
*Gentiana* × *marcailhouana* Rouy  
*Gentiana* × *marceli-jouseaui* Halda  
*Gentiana masonii* T.N.Ho  
*Gentiana* × *media* Arv.-Touv.  
*Gentiana meiantha* (C.B.Clarke) Harry Sm.  
*Gentiana melandriifolia* Franch. ex Hemsl.  
*Gentiana membranulifera* T.N.Ho  
*Gentiana membranulifera* var. *intermedia* (C.B.Clarke) T.N.Ho  
*Gentiana micans* C.B.Clarke  
*Gentiana micantiformis* Burkill  
*Gentiana microdonta* Franch. ex Hemsl.  
*Gentiana microdonta* subsp. *omeiensis* (T.N.Ho) Halda  
*Gentiana microdonta* subsp. *phyllopoda* (H.Le\$Av.) Halda  
*Gentiana microphyta* Franch. ex Hemsl.  
*Gentiana mirandae* Paray  
*Gentiana moniliformis* C.Marquand  
*Gentiana muscicola* C.Marquand  
*Gentiana muscicola* subsp. *lacinulata* (T.N.Ho) Halda  
*Gentiana myrioclada* Franch.  
*Gentiana namlaensis* C.Marquand  
*Gentiana nanobella* C.Marquand  
*Gentiana nerterifolia* P.Royen  
*Gentiana newberryi* A.Gray  
*Gentiana newberryi* subsp. *tiogana* (A.Heller) Halda  
*Gentiana nipponica* Maxim.  
*Gentiana nivalis* L.  
*Gentiana nopscae* (Jáv.) Wraber  
*Gentiana nubigena* Edgew.  
*Gentiana nudicaulis* Kurz

---

---

*Gentiana nudicaulis* subsp. *lakshnakarae* (Kerr) Halda  
*Gentiana nudicaulis* subsp. *ting-nung-hoae* (Halda) T.N.Ho  
*Gentiana nyalamensis* T.N.Ho  
*Gentiana obconica* T.N.Ho  
*Gentiana occidentalis* Jakow.  
*Gentiana officinalis* Harry Sm.  
*Gentiana olgae* Regel ex Schmalh.  
*Gentiana oligophylla* Harry Sm.  
*Gentiana olivieri* Griseb.  
*Gentiana oreodoxa* Harry Sm.  
*Gentiana ornata* (D.Don) Wall. ex Griseb.  
*Gentiana oschtenica* Woronow  
*Gentiana otophora* Franch. ex Hemsl.  
*Gentiana otophora* subsp. *sichitoensis* (C.Marquand) Halda  
*Gentiana otophoroides* Harry Sm.  
*Gentiana ovatiloba* Kusn.  
*Gentiana ovatiloba* subsp. *chazaroi* (H.H.Iltis) T.N.Ho  
*Gentiana pachyphylla* Merr.  
*Gentiana* × *pallidocyanea* J.S.Pringle  
*Gentiana pannonica* Scop.  
*Gentiana panthaica* Prain & Burkill  
*Gentiana panthaica* var. *epichysantha* (Hand.-Mazz.) Harry Sm.  
*Gentiana papillosa* Franch.  
*Gentiana paradoxa* Albov  
*Gentiana parryae* C.Marquand  
*Gentiana parryi* Engelm.  
*Gentiana parvula* Harry Sm.  
*Gentiana pedata* Harry Sm.  
*Gentiana pedata* subsp. *xingrenensis* (T.N.Ho) Halda  
*Gentiana pedicellata* (D.Don) Wall.  
*Gentiana pedicellata* subsp. *glabriuscula* (Harry Sm. ex T.N.Ho) Halda  
*Gentiana pedicellata* subsp. *zeylanica* (Griseb.) Halda  
*Gentiana penetii* (Litard. & Maire) Romo  
*Gentiana perpusilla* Brandegee  
*Gentiana phyllocalyx* C.B.Clarke  
*Gentiana piasezkii* Maxim.  
*Gentiana piasezkii* subsp. *pubicaulis* (Harry Sm.) Halda  
*Gentiana picta* Franch. ex Hemsl.  
*Gentiana platypetala* Griseb.  
*Gentiana plurisetosa* C.T.Mason  
*Gentiana pneumonanthe* L.  
*Gentiana praeclara* C.Marquand  
*Gentiana praticola* Franch.  
*Gentiana praticola* subsp. *greenwayae* (Merr.) Halda  
*Gentiana prattii* Kusn.  
*Gentiana primuliflora* Franch.

---

---

*Gentiana primuliflora* subsp. *melvillei* (S.Moore) Halda  
*Gentiana producta* T.N.Ho  
*Gentiana prolata* Balf.f.  
*Gentiana prostrata* Haenke  
*Gentiana prostrata* var. *crenulatotruncata* C.Marquand  
*Gentiana prostrata* var. *karelinii* (Griseb.) Kusn.  
*Gentiana prostrata* var. *ludlowii* (C.Marquand) T.N.Ho  
*Gentiana prostrata* subsp. *nutans* (Bunge) Halda  
*Gentiana prostrata* var. *pudica* (Maxim.) Kusn.  
*Gentiana pseudosquarrosa* Harry Sm.  
*Gentiana pseudosquarrosa* subsp. *ludingensis* (T.N.Ho) Halda  
*Gentiana pterocalyx* Franch.  
*Gentiana puberulenta* J.S.Pringle  
*Gentiana pubigera* C.Marquand  
*Gentiana pubigera* var. *glabrescens* Harry Sm.  
*Gentiana pubigera* subsp. *ninglangensis* (T.N.Ho) Halda  
*Gentiana pubigera* subsp. *pubiflora* (T.N.Ho) Halda  
*Gentiana pulvinarum* W.W.Sm.  
*Gentiana pulvinarum* subsp. *subtilis* (Harry Sm.) T.N.Ho  
*Gentiana pumila* Jacq.  
*Gentiana pumila* subsp. *delphinensis* (Beauverd) P.Fourn.  
*Gentiana pumilio* Standl. & Steyerl.  
*Gentiana punctata* L.  
*Gentiana purpurea* L.  
*Gentiana pyrenaica* L.  
*Gentiana qiujiangensis* T.N.Ho  
*Gentiana quadrifaria* Blume  
*Gentiana radiata* C.Marquand  
*Gentiana recurvata* C.B.Clarke  
*Gentiana recurvata* subsp. *prainii* (Burkill) Halda  
*Gentiana rhodantha* Franch. ex Hemsl.  
*Gentiana riparia* Kar. & Kir.  
*Gentiana riparia* subsp. *daochengensis* (T.N.Ho) Halda  
*Gentiana robusta* King ex Hook.f.  
*Gentiana rostarii* Reut. ex Verlot  
*Gentiana rubicunda* Franch.  
*Gentiana rubicunda* subsp. *biloba* (T.N.Ho) Halda  
*Gentiana rubicunda* subsp. *delicata* (Hance) Halda  
*Gentiana rubicunda* subsp. *filisepala* (T.N.Ho) Halda  
*Gentiana rubicunda* var. *purpurata* (Maxim. ex Kusn.) T.N.Ho  
*Gentiana rubicunda* subsp. *samolifolia* (Franch.) Halda  
*Gentiana rubricaulis* Schwein.  
*Gentiana sagarmathae* Miyam. & H.Ohba  
*Gentiana saginifolia* Wernham  
*Gentiana saginifolia* var. *montiswilhelmi* (P.Royen) Halda  
*Gentiana saginoides* Burkill

---



---

*Gentiana saltuum* C.Marquand  
*Gentiana saponaria* L.  
*Gentiana satsunanensis* T.Yamaz.  
*Gentiana scabra* Bunge  
*Gentiana scabra* var. *buergeri* (Miq.) Maxim. ex Franch. & Sav.  
*Gentiana scabra* var. *kitadakensis* (N.Yonez.) Halda  
*Gentiana scabrida* Hayata  
*Gentiana scabrida* subsp. *horaimontana* (Masam.) Halda  
*Gentiana scabrida* subsp. *itzershanensis* (T.S.Liu & C.C.Kuo) Halda  
*Gentiana scabrida* subsp. *luzoniensis* (Merr.) Halda  
*Gentiana sceptrum* Griseb.  
*Gentiana sedifolia* Kunth  
*Gentiana septemfida* Pall.  
*Gentiana septemfida* subsp. *grossheimii* (Doluch.) Halda  
*Gentiana septemfida* subsp. *kolakovskiyi* (Doluch.) Halda  
*Gentiana septemfida* subsp. *overinii* (Grossh.) Halda  
*Gentiana serra* Franch.  
*Gentiana setigera* A.Gray  
*Gentiana shaanxiensis* T.N.Ho  
*Gentiana sierrae* Briq.  
*Gentiana sikkimensis* C.B.Clarke  
*Gentiana sikokiana* Maxim.  
*Gentiana simulatrix* C.Marquand  
*Gentiana sino-ornata* Balf.f.  
*Gentiana siphonantha* Maxim. ex Kusn.  
*Gentiana souliei* Franch.  
*Gentiana spathacea* Kunth  
*Gentiana spathulifolia* Kusn.  
*Gentiana spathulifolia* var. *abaensis* (T.N.Ho) Halda  
*Gentiana spathulisepala* T.N.Ho & S.W.Liu  
*Gentiana squarrosa* Ledeb.  
*Gentiana stellata* Turrill  
*Gentiana stellulata* Harry Sm.  
*Gentiana stipitata* Edgew.  
*Gentiana stipitata* subsp. *tizuensis* (Franch.) T.N.Ho  
*Gentiana stragulata* Balf.f. & Forrest  
*Gentiana straminea* Maxim.  
*Gentiana striata* Maxim.  
*Gentiana stylophora* C.B.Clarke  
*Gentiana suborbisepala* C.Marquand  
*Gentiana subpolytrichoides* Grubov  
*Gentiana subuliformis* S.W.Liu  
*Gentiana sumatrana* Ridl.  
*Gentiana susamyrensis* Pachom.  
*Gentiana sutchuenensis* Franch. ex Hemsl.  
*Gentiana szechenyii* Kanitz

---

---

*Gentiana taiwanica* T.N.Ho  
*Gentiana takushii* T.Yamaz.  
*Gentiana taliensis* Balf.f. & Forrest  
*Gentiana tatsienensis* Franch.  
*Gentiana terglouensis* Hacq.  
*Gentiana terglouensis* subsp. *schleicheri* (Vacc.) Tutin  
*Gentiana ternifolia* Franch.  
*Gentiana tetraphylla* Maxim. ex Kusn.  
*Gentiana tetrasepala* Biswas  
*Gentiana tetrasticha* C.Marquand  
*Gentiana thunbergii* (G.Don) Griseb.  
*Gentiana thunbergii* var. *minor* Maxim.  
*Gentiana tianschanica* Rupr. ex Kusn.  
*Gentiana tibetica* King ex Hook.f.  
*Gentiana timida* Kerr  
*Gentiana tongolensis* Franch.  
*Gentiana tonkinensis* Hul  
*Gentiana trichotoma* Kusn.  
*Gentiana trichotoma* subsp. *chingii* (C.Marquand) Halda  
*Gentiana tricolor* Diels & Gilg  
*Gentiana tricolor* subsp. *syringea* (T.N.Ho) Halda  
*Gentiana triflora* Pall.  
*Gentiana triflora* subsp. *japonica* (Kusn.) Vorosch.  
*Gentiana tubiflora* (G.Don) Griseb.  
*Gentiana uchiyamae* Nakai  
*Gentiana ulmeri* Merr.  
*Gentiana uniflora* Georgi  
*Gentiana urnula* Harry Sm.  
*Gentiana utriculosa* L.  
*Gentiana vandellioides* Hemsl.  
*Gentiana vandellioides* subsp. *baoxingensis* (T.N.Ho) Halda  
*Gentiana vandellioides* subsp. *yiliangensis* (T.N.Ho) Halda  
*Gentiana vandewateri* Wernham  
*Gentiana veitchiorum* Hemsl.  
*Gentiana venosa* Hemsl.  
*Gentiana venusta* (G.Don) Wall. ex Griseb.  
*Gentiana verna* L.  
*Gentiana verna* subsp. *oschtenica* (Kusn.) Halda  
*Gentiana verna* subsp. *pontica* (Soltok.) Hayek  
*Gentiana verna* subsp. *tergestina* (Beck) Hayek  
*Gentiana vernayi* C.Marquand  
*Gentiana vernayi* subsp. *atropurpurea* (T.N.Ho) Halda  
*Gentiana viatrix* Harry Sm. ex C.Marquand  
*Gentiana villifera* H.W.Li ex T.N.Ho  
*Gentiana villosa* L.  
*Gentiana waltonii* Burkill

---

---

*Gentiana walujewii* Regel & Schmalh.  
*Gentiana walujewii* subsp. *tenuicaulis* (Ling) Halda  
*Gentiana wangchukii* E.Aitken & D.G.Long  
*Gentiana wardii* W.W.Sm.  
*Gentiana wardii* subsp. *emergens* (C.Marquand) Halda  
*Gentiana wardii* subsp. *micrantha* (C.Marquand) Halda  
*Gentiana wasenensis* C.Marquand  
*Gentiana wilsonii* C.Marquand  
*Gentiana wilsonii* subsp. *striolata* (T.N.Ho) Halda  
*Gentiana winchuanensis* T.N.Ho  
*Gentiana wingecarribiensis* L.G.Adams  
*Gentiana wingecarribiensis* var. *wissmannii* (J.B.Williams) Halda  
*Gentiana wootchuliana* W.Paik  
*Gentiana xanthonannos* Harry Sm.  
*Gentiana yakushimensis* Makino  
*Gentiana yokusai* Burkill  
*Gentiana yunnanensis* Franch.  
*Gentiana yunnanensis* subsp. *kialensis* (C.Marquand) Halda  
*Gentiana zekuensis* T.N.Ho & S.W.Liu  
*Gentiana zollingeri* Fawc.  
*Gentiana zollingeri* subsp. *tentyoensis* (Masam.) Halda

---
